## **Flagella Ca<sup>2+</sup> elevations regulate pausing of retrograde intraflagellar transport trains in adherent *Chlamydomonas* flagella**

Cecile Fort<sup>1</sup>, Peter Collingridge<sup>1</sup>, Colin Brownlee<sup>1,2</sup>, Glen Wheeler<sup>1\*</sup>

1 Marine Biological Association, The Laboratory, Citadel Hill, Plymouth, PL1 2PB, UK

2 School of Ocean and Earth Science, University of Southampton, Southampton, SO14 3ZH, UK.

\* corresponding author: [glw@mba.ac.uk](mailto:glw@mba.ac.uk)

## Abstract

The movement of ciliary membrane proteins is directed by transient interactions with intraflagellar transport (IFT) trains. The green alga *Chlamydomonas* has adapted this process for gliding motility, using IFT to move adhesive glycoproteins (FMG-1B) in the flagella membrane. Although  $\text{Ca}^{2+}$  signalling contributes directly to the gliding process, uncertainty remains over the mechanisms through which  $\text{Ca}^{2+}$  acts to influence the movement of IFT trains. Here we show that flagella  $\text{Ca}^{2+}$  elevations regulate IFT primarily by initiating the movement of paused retrograde IFT trains. Flagella  $\text{Ca}^{2+}$  elevations exhibit complex spatial and temporal properties, including high frequency repetitive  $\text{Ca}^{2+}$  elevations that prevent the accumulation of paused retrograde IFT trains. We show that flagella  $\text{Ca}^{2+}$  elevations disrupt the IFT-dependent movement of microspheres along the flagella membrane. The results suggest that flagella  $\text{Ca}^{2+}$  elevations directly disrupt the interaction between retrograde IFT particles and flagella membrane glycoproteins to modulate gliding motility and the adhesion of the flagellum to a surface.

## Introduction

Cilia and flagella are microtubule-rich organelles that extend from the surface of many eukaryote cell types. Cilia play well-characterised roles in motility, but also have additional roles as important cellular sensors. The elongated morphology of eukaryote cilia (length 1-20  $\mu\text{m}$ , diameter 200 nm) requires specialised mechanisms to transport proteins along its length. This is achieved through the process of intraflagellar transport (IFT), in which cargo proteins required for the assembly, maintenance and sensory functions of cilia are attached to large protein complexes (IFT particles) and moved along the axoneme through the activity of microtubule motors<sup>1</sup>. Kinesin-2 directs movement away from the cell body (anterograde), while dynein-1b (dynein 2 in mammals) mediates the return of IFT particles towards the cell (retrograde). The anterograde IFT particles are assembled into trains, which move in a processive manner to the ciliary tip. Once the anterograde IFT particles reach the ciliary tip, kinesin dissociates from the IFT particle and returns to the cell body via diffusion. The diffusive return of kinesin to the cell body may play a critical role in regulating ciliary length, acting to limit the rate at which IFT particles can enter the flagellum<sup>2,3</sup>. IFT trains at the ciliary tip dissociate into multiple smaller trains and move back towards the cell body<sup>2</sup>. Although dynein-1b is present on anterograde IFT particles, it is carried along the axoneme in an auto-inhibited form until it reaches the flagella tip to prevent a tug-of-war between the two microtubule motors<sup>4</sup>.

The import, export and movement of many ciliary proteins is determined by their interactions with IFT particles. IFT particles are composed of around 20 proteins arranged into two sub-complexes (IFT-A and IFT-B). Proteins within the IFT-B complex have specific roles in binding to cargo proteins including important structural components such as tubulin (IFT74/81) and outer arm dynein (IFT46)<sup>5,6</sup>. IFT-A proteins interact with cargo proteins involved in signalling pathways, such as G-protein coupled receptors<sup>7</sup>. Expression of a truncated IFT-A protein (IFT140) in *Chlamydomonas* flagella resulted in a reduced complement of membrane-associated proteins, such as small GTPases and ion channels<sup>8</sup>. An additional protein complex, known as the BBsome, acts as a cargo adapter and is implicated in the transport of a range of membrane-associated ciliary proteins<sup>9</sup>. Distinct proteins within the IFT complex play therefore specific roles in binding to cargo proteins, although the factors regulating interactions between cargo proteins and IFT particles are less well-characterised. Improved knowledge of these processes is required to better understand the mechanisms determining the movement and distribution of ciliary proteins.

There is evidence that loading and unloading of some ciliary proteins is a highly regulated process<sup>10</sup>. Second messengers such as  $\text{Ca}^{2+}$  and cAMP may also contribute to the regulation of cargo binding<sup>11</sup>. For example, mice lacking the ciliary localised  $\text{Ca}^{2+}$ -permeable ion channel PKD2L1 exhibit defects in the IFT-dependent trafficking of the Shh transcription factor Gli2 to the tip of the primary cilium<sup>12</sup>. In *Chlamydomonas*, phosphorylation of the FLA8 kinesin subunit by the  $\text{Ca}^{2+}$ -dependent

protein kinase CDPK1 blocks FLA8 entry in to the flagellum and promotes dissociation of kinesin from the IFT particles at the ciliary tip, suggesting a role for  $\text{Ca}^{2+}$  in cargo unloading <sup>13</sup>.

Calcium has also been implicated in the movement of flagella membrane proteins in *Chlamydomonas*. An adhesive glycoprotein in the flagella membrane (FMG-1B) allows *Chlamydomonas* cells to adhere to substrates <sup>14-16</sup>. Transient interactions between FMG-1B and IFT particles direct the movement of FMG-1B along the flagella, demonstrated by the co-localisation of individual IFT trains with polystyrene microspheres moving along the flagella surface <sup>17</sup>. This process is utilised to drive gliding motility in *Chlamydomonas*, where the cell moves along a surface on its adherent flagella. The motile force is provided by the retrograde movement of FMG-1B along the flagellum, which results in the flagellum pulling the cell body forward <sup>15, 18</sup>. Gliding motility is therefore caused by transient associations between FMG-1B and retrograde IFT particles, representing an excellent system in which to study dynamic interactions between cargo proteins and IFT particles.

Gliding motility is regulated by  $\text{Ca}^{2+}$ , requiring micromolar  $\text{Ca}^{2+}$  in the external media <sup>19</sup>. Bead movement is also inhibited by the absence of  $\text{Ca}^{2+}$  or by the presence of diltiazem, an inhibitor of voltage-gated  $\text{Ca}^{2+}$  channels <sup>19</sup>. The implication of IFT motors in gliding suggests that  $\text{Ca}^{2+}$  most likely acts to regulate the interaction between IFT and FMG-1B. Shih *et al* <sup>17</sup> found that chelating external  $\text{Ca}^{2+}$  reduced the pausing frequency of IFT trains, suggesting that  $\text{Ca}^{2+}$  was required for the interaction between FMG-1B and IFT particles. In contrast, Collingridge *et al* <sup>20</sup> found that the absence of external  $\text{Ca}^{2+}$  led to a substantial accumulation of IFT particles in adherent flagella, suggesting that  $\text{Ca}^{2+}$  acts to disrupt rather than promote the interaction between FMG-1B and the IFT particle. This was supported by simultaneous imaging of intraflagellar  $\text{Ca}^{2+}$  ( $[\text{Ca}^{2+}]_{\text{fla}}$ ) and IFT using biolistically-loaded dextran-conjugated  $\text{Ca}^{2+}$ -responsive fluorescent dyes, which showed that  $[\text{Ca}^{2+}]_{\text{fla}}$  elevations acted to initiate the movement of paused IFT particles <sup>20</sup>.

The discrepancy between these two findings cannot easily be resolved, yet it clearly indicates that greater understanding of the interaction between  $[\text{Ca}^{2+}]_{\text{fla}}$  and IFT is required. In particular, the nature of paused anterograde and retrograde IFT trains, and the role of  $[\text{Ca}^{2+}]_{\text{fla}}$  in regulating this process, requires more detailed study. Direct evidence for a regulatory function for  $[\text{Ca}^{2+}]_{\text{fla}}$  in the interaction between FMG-1B and the IFT particle is currently lacking. The interaction between FMG-1B and IFT may also influence other aspects of flagella function, such as flagella adhesion. Recent observations indicate that the adhesive properties of *Chlamydomonas* flagella are highly dynamic, with blue light promoting rapid changes in flagella adhesion to a surface <sup>21, 22</sup>. Light-dependent adhesion appears to involve a redistribution of FMG-1B along the flagella surface <sup>22</sup>, which may therefore be dependent on interactions with IFT.  $\text{Ca}^{2+}$ -dependent signalling processes also contribute to many other flagellar functions in *Chlamydomonas*, such as changes in flagellar beat and waveform during motile responses, flagellar adhesion during mating, flagellar excision and flagellar length control <sup>23-26</sup>. A more

detailed study of the nature of  $\text{Ca}^{2+}$  signalling in flagella is required to help us understand how  $\text{Ca}^{2+}$  acts in these multiple roles within flagella and how specificity for each signalling role is achieved.

In this study, we have examined the interactions between  $[\text{Ca}^{2+}]_{\text{fla}}$  and IFT in adherent *Chlamydomonas* flagella. Using genetically encoded  $\text{Ca}^{2+}$  reporters targeted to the flagella, we demonstrate that intraflagellar  $\text{Ca}^{2+}$  elevations act primarily to regulate the accumulation of paused retrograde IFT particles, by promoting their dissociation from the flagella membrane. We also reveal complex spatiotemporal characteristics of  $\text{Ca}^{2+}$  in *Chlamydomonas* flagella, such as repetitive high frequency  $\text{Ca}^{2+}$  spiking and the presence of localised or propagating  $[\text{Ca}^{2+}]_{\text{fla}}$  elevations, showing that  $\text{Ca}^{2+}$  acts locally in its interaction with IFT. By regulating the interaction between IFT and FMG-1B,  $[\text{Ca}^{2+}]_{\text{fla}}$  elevations play an important role in modulating flagella adhesion.

## Results

### Distinct forms of paused IFT particles in *Chlamydomonas* flagella

We have previously observed that accumulations of paused IFT trains are associated with gliding motility in adherent flagella<sup>20</sup>. To examine the nature of the paused IFT trains in greater detail, we used TIRF microscopy of a reporter strain expressing IFT54-mScarlet (strain IFT54-MS). We observed two clear categories of paused IFT particles (Fig 1A). The first of these consisted of paused anterograde IFT particles, which remain highly localised, and continue in an anterograde direction. Paused anterograde IFT trains may disrupt the movement of other anterograde IFT trains, but do not interfere with retrograde transport<sup>27</sup>. The second category of paused IFT particles was primarily observed near the distal tip of the flagellum. These accumulations appear more diffuse spatially and characteristically slowly expand in size and fluorescence intensity (Fig 1A). The distal IFT accumulations were periodically cleared by retrograde transport, suggesting that they represent paused retrograde IFT trains. This was supported by the presence of similar distal accumulations of IFT trains in a reporter strain for the dynein light intermediate chain (D1bLIC) of cytoplasmic dynein 1b (the retrograde IFT motor)<sup>28</sup> (Fig 1B), whereas similar accumulations were absent in a reporter strain for the KAP subunit of kinesin (the anterograde IFT motor)<sup>20,29</sup>. As kinesin returns to the cell body via diffusion and is not present in retrograde IFT trains<sup>2</sup>, the distal IFT accumulations are likely to be formed by paused retrograde IFT trains.

The diffuse nature of the distal IFT accumulations and their location close to the flagella tip made it difficult to observe directly whether they are composed of retrograde IFT trains. We therefore employed a fluorescence recovery after photobleaching (FRAP) approach to observe how individual IFT trains contribute to these accumulations. Bleaching of flagella exhibiting distal accumulations of paused IFT trains, revealed that individual anterograde IFT trains proceeded to the flagella tip and were largely unimpeded by the accumulation of paused IFT trains (Fig 1C-E). Accumulations of paused IFT trains began to form close to the flagella tip immediately after the arrival of the initial anterograde IFT train after bleaching. The accumulated IFT particles are therefore formed by retrograde IFT particles that pause in the vicinity of the flagella tip immediately after turnaround and departure. The distal IFT accumulations expand in size due to additional retrograde IFT particles arriving at the distal end of the accumulation, rather than either anterograde or retrograde IFT trains adding to the accumulation at its proximal end. As anterograde and retrograde IFT particles travel on distinct microtubules within each doublet<sup>27</sup>, the accumulation of retrograde IFT particles at the flagella tip does not appear to immediately interfere with anterograde IFT, but may impede the return of retrograde IFT particles.

### Development of a flagella-targeted calcium sensor in *Chlamydomonas*

To identify the role of  $[Ca^{2+}]_{fla}$  elevations in regulating IFT pausing and other events, we targeted a genetically encoded  $Ca^{2+}$ -sensitive reporter protein (G-GECO1.1) to *Chlamydomonas* flagella. We fused G-GECO to the C-terminus of CAH6, an abundant carbonic anhydrase that is associated with the flagella membrane and shows an even distribution along the length of the flagellum<sup>9, 30, 31</sup> (Fig 2A). Using this approach, we were able to successfully target G-GECO to the flagella of *Chlamydomonas* strain CC5325 (producing strain GG-WT). TIRF microscopy of adherent flagella revealed that  $[Ca^{2+}]_{fla}$  elevations were associated with gliding movement.  $[Ca^{2+}]_{fla}$  elevations were observed in 94.8 % of trailing flagella at the onset of the gliding motility (n = 116), but were largely absent from leading flagella (Fig 2B-D; Video 1), strongly supporting previous observations of gliding-related  $[Ca^{2+}]_{fla}$  elevations using biolistically-loaded  $Ca^{2+}$ -responsive fluorescent dyes (Oregon Green-BAPTA-dextran)<sup>20</sup>. Cells expressing CAH6-Venus did not exhibit any changes in fluorescence during gliding motility, indicating that motion artefacts were not responsible for changes in G-GECO fluorescence (Supplementary Fig 1).

We next examined the influence of different surface properties on gliding motility and flagella  $Ca^{2+}$  signalling. On non-treated glass coverslips,  $[Ca^{2+}]_{fla}$  elevations in adherent flagella were associated primarily with flagella movement (Fig3A). Treating the glass coverslip with 0.1% poly-L-lysine greatly reduced gliding motility and flagella lifting, suggesting that the flagella are unable to overcome the increased adhesion to the surface. The immobilised adherent flagella exhibited highly repetitive  $[Ca^{2+}]_{fla}$  elevations, with frequencies up to 0.57 Hz (Fig 3B). 63.6% of flagella on poly-lysine treated coverslips exhibited  $Ca^{2+}$  elevations at a frequency greater than 0.17 Hz, compared to 8.3% of flagella on untreated coverslips (Fig 3C). The repetitive  $[Ca^{2+}]_{fla}$  elevations were not associated with motility, but occurred in immobilised flagella that were strongly adhered to the poly-lysine treated surface. Removing external  $Ca^{2+}$  strongly inhibited the repetitive  $[Ca^{2+}]_{fla}$  elevations, indicating that they require  $Ca^{2+}$  influx across the flagella membrane (Fig 3D).

### **$[Ca^{2+}]_{fla}$ elevations coincide with the clearance of paused distal IFT accumulations**

Expression of G-GECO in the IFT54-mScarlet reporter strain in combination with the immobilisation of flagella on poly-lysine treated coverslips enabled us to perform a detailed study of the interaction between  $[Ca^{2+}]_{fla}$  elevations and distinct IFT processes. Flagella exhibiting a very high frequency of  $[Ca^{2+}]_{fla}$  elevations (>0.25 Hz) were excluded from this initial analysis to prevent false correlations with high frequency IFT events (e.g. entry of IFT trains occurs at 1-1.3 Hz)<sup>32</sup>. The entry of anterograde IFT trains into the flagellum, the arrival of anterograde IFT trains at the flagella tip and the departure of retrograde IFT trains from the flagella tip did not show a close relationship with  $[Ca^{2+}]_{fla}$ , as these IFT events occurred both in the presence and absence of  $[Ca^{2+}]_{fla}$  elevations (Fig 4A-

B). We also found no evidence for a correlation between elevated  $[Ca^{2+}]_{fla}$  and the pausing or restarting of anterograde IFT trains. We were unable to clearly resolve the timing at which individual retrograde IFT trains paused, although it was clear that the characteristic distal IFT accumulations occur in periods lacking  $[Ca^{2+}]_{fla}$  elevations (Fig 4A). However, in contrast to all other IFT events noted above, the restart of paused retrograde IFT trains showed a close association with elevated  $[Ca^{2+}]_{fla}$  (Fig 4A-B). 90.2% of these events coincided with the onset of a  $[Ca^{2+}]_{fla}$  elevation (defined as occurring within 0.5 s, n=41 events) (Fig 4C-D). Other IFT events only rarely coincided with the onset of  $[Ca^{2+}]_{fla}$  elevations.

In flagella exhibiting periodic  $[Ca^{2+}]_{fla}$  elevations (0.1-0.25 Hz), the mean velocity of anterograde IFT trains was not influenced by elevated  $[Ca^{2+}]_{fla}$ , but there was a slight increase (+12.4 %) in the velocity of retrograde IFT trains in the presence of elevated  $[Ca^{2+}]_{fla}$  (Fig 4E). This may indicate a reduction in transient pausing of retrograde IFT trains during  $[Ca^{2+}]_{fla}$  elevations.

We conclude that the primary role of  $[Ca^{2+}]_{fla}$  elevations in adherent flagella is to initiate the movement of paused retrograde IFT trains. We find no evidence for a direct requirement for  $[Ca^{2+}]_{fla}$  elevations in the entry and turnaround of IFT trains, or in the pausing of anterograde IFT trains, suggesting that these processes are not directly regulated by the observed  $[Ca^{2+}]_{fla}$  elevations, although our analysis does not rule out a role for  $Ca^{2+}$  in these processes via alternative mechanisms. For example,  $Ca^{2+}$ -dependent protein kinases have been implicated in the dissociation of kinesin from IFT particles at the flagella tip during IFT turnover<sup>13</sup>. As gradients in resting cytosolic  $Ca^{2+}$  can be observed in some cells, notably in polarised plant cells such as root hairs or pollen tubes<sup>33, 34</sup>, we investigated whether resting  $[Ca^{2+}]_{fla}$  differed at the flagella tip. The median intensity of CAH6-G-GECO or CAH6-Venus (as a non- $Ca^{2+}$ -responsive control) did not differ along the length of the flagellum (Supplementary Fig 2). We also examined cells that had been biolistically loaded with the  $Ca^{2+}$ -responsive dye Oregon Green BAPTA dextran (OGB) and the non- $Ca^{2+}$ -responsive dye Texas Red dextran (TR), enabling ratiometric imaging of  $[Ca^{2+}]_{fla}$ . The ratio of OGB/TR was similar along the length of the flagellum, indicating that resting  $[Ca^{2+}]_{fla}$  is not consistently elevated at the flagella tip relative to the rest of the flagellum.

### **Repetitive $[Ca^{2+}]_{fla}$ elevations prevent distal IFT accumulations in adherent flagella**

Comparison of flagella on untreated and poly-lysine treated surfaces indicated that the nature of IFT differed markedly. On a poly-lysine treated surface, where flagella exhibit repetitive  $Ca^{2+}$  elevations, the movement of IFT trains was more regular, with a higher frequency of anterograde and retrograde IFT trains (Fig 5A-C). Notably, during periods of high frequency  $[Ca^{2+}]_{fla}$  elevations, significant distal accumulations of retrograde IFT trains were not observed, whereas anterograde IFT trains continued to pause and restart. These observations suggest that repetitive  $[Ca^{2+}]_{fla}$  elevations act



to prevent the distal accumulations of paused retrograde IFT trains. Examination of flagella exhibiting intermittent periods of repetitive  $\text{Ca}^{2+}$  fla elevations revealed that the transition between these patterns of IFT could be very rapid (Supplementary Fig 3; Video 2). Experimentally inhibiting  $\text{Ca}^{2+}$  signalling using a perfusion system to remove external  $\text{Ca}^{2+}$  resulted in the rapid cessation of  $[\text{Ca}^{2+}]_{\text{fla}}$  elevations and the accumulation of IFT trains in the distal region (Supplementary fig 4). This coincided with a clear reduction in the frequency of retrograde IFT trains.

We have previously shown that removing external  $\text{Ca}^{2+}$  for longer periods (>5 minutes) results in the substantial overaccumulation of IFT20-mCherry in adherent flagella<sup>20</sup> and confirmed that this was also the case for IFT54-mScarlet and D1bLIC-GFP (Supplementary Fig 4A-B). Retrograde IFT is largely absent from these flagella, although anterograde IFT can still be observed, albeit with a reduced frequency and velocity. As  $[\text{Ca}^{2+}]_{\text{fla}}$  elevations have no short term impact on the pausing of anterograde IFT trains or their velocity (Fig 4), the effect of removing  $\text{Ca}^{2+}$  on anterograde IFT likely results from the overaccumulation of retrograde IFT trains. Anterograde IFT trains frequently paused or slowed in the vicinity of large accumulations of IFT trains, suggesting that they are impeded by the paused retrograde IFT trains. This conclusion is seemingly at odds with the finding that anterograde and retrograde IFT trains travel on distinct microtubules and do not collide<sup>27</sup>. We therefore examined the nature of these distal accumulations by transmission electron microscopy (TEM) of adherent flagella. After the removal of external  $\text{Ca}^{2+}$  for 5 minutes, TEM of adherent flagella revealed large accumulations of IFT particles in a prominent swelling near the distal tip (Supplementary Fig 4C). The accumulated IFT trains represent a similar phenotype to the flagella of strains defective in retrograde IFT, such as mutants in cytoplasmic dynein<sup>30,35</sup>. We propose that prolonged inhibition of  $\text{Ca}^{2+}$  signalling results in retrograde IFT trains accumulating behind the retrograde IFT trains that have already paused. In the absence of a mechanism to clear the paused retrograde IFT trains, they can accumulate to an extent where they significantly impede the progress of anterograde IFT trains, even if these IFT trains move along a distinct microtubule track.

### **Detachment from a surface requires external $\text{Ca}^{2+}$**

Our results show that  $[\text{Ca}^{2+}]_{\text{fla}}$  elevations are required to regulate the accumulation of paused retrograde IFT trains. This process is essential for gliding motility<sup>20</sup>, but may also modulate flagella adhesion to a surface. Flagella lifting is often initiated by axonemal bending in the non-adherent region of the flagellum, resulting in the flagellum being dragged towards the cell body so that only the flagella tips remain adherent. We found that flagella lifting was strongly associated with  $[\text{Ca}^{2+}]_{\text{fla}}$  elevations, with both the GG-WT and GG-IFT54-MS strains routinely exhibiting a  $[\text{Ca}^{2+}]_{\text{fla}}$  elevation with each lifting event (Supplementary Fig 5A-B). Detailed examination of the timing of lifting events revealed that in all cases the  $[\text{Ca}^{2+}]_{\text{fla}}$  elevation immediately preceded the initial movement of the flagellum

towards the cell body (Supplementary Fig 5C).  $[Ca^{2+}]_{fla}$  elevations associated with lifting and gliding are therefore both linked to the dragging of flagella along a surface, suggesting that they are caused by an increase in membrane tension. We propose that the  $[Ca^{2+}]_{fla}$  elevations act to release FMG-1B from paused retrograde IFT trains, which removes resistance to the pulling force generated by bending the axoneme and allows the flagella to be withdrawn towards the cell body and lifted from the surface.

We next examined whether  $Ca^{2+}$ -dependent removal of paused retrograde IFT trains was also required for light-modulated flagella detachment. *Chlamydomonas* cells (strain SAG-11-32b) suspended on a micropipette detach their flagella from a surface within 30 s after the removing blue light<sup>22</sup>. We found that removing blue light from adherent IFT54-MS cells also promoted flagella detachment after 30 seconds, with flagella either remaining only attached at the flagella tips or lifting from the surface entirely (11 out of 14 cells) (Supplementary Fig 5D). Flagella movements prior to lifting were preceded by the removal of paused retrograde IFT trains (Supplementary Fig 5E). As G-GECO requires blue light excitation, it was not possible to measure  $[Ca^{2+}]_{fla}$  directly during these movements. However, removing blue light in the absence of external  $Ca^{2+}$  did not result in flagella lifting or the removal of paused retrograde IFT trains (0 out of 17 cells) (Supplementary Fig 5F). Note that non-adherent cells were able to swim in the absence of  $Ca^{2+}$ , indicating that inhibition of  $Ca^{2+}$  signalling did not act to simply immobilise flagella. The results indicate that light-dependent flagella detachment requires the  $Ca^{2+}$ -dependent release of FMG-1B from paused retrograde IFT trains. This allows FMG-1B to move in an unrestricted manner in the flagella membrane, facilitating the lifting movements.

### **$[Ca^{2+}]_{fla}$ elevations have distinct spatial properties**

The  $[Ca^{2+}]_{fla}$  elevations observed in *Chlamydomonas* not only show complex temporal patterns, but also distinct spatial properties. The majority of  $[Ca^{2+}]_{fla}$  elevations spanned the entire length of the flagellum. However, in cells exhibiting lower frequency  $Ca^{2+}$  elevations (<0.25 Hz), 35.7% of the  $[Ca^{2+}]_{fla}$  elevations were restricted to either the proximal or the distal region of the flagellum (Fig 6A-B). In addition, many of the  $[Ca^{2+}]_{fla}$  elevations that did span the length of the flagellum did not rise simultaneously along the length of the flagellum. 28.1% of  $[Ca^{2+}]_{fla}$  elevations exhibited a difference >0.2 s in onset between the distal and proximal regions (Fig 6C). Closer examination of these signalling events indicated that they resemble a  $Ca^{2+}$  wave that propagates along the length of the flagellum in either direction, with 43.8% propagating in a retrograde direction and 56.2% propagating in an anterograde direction. The mean rate of propagation was  $28.7 \pm 4.3 \mu\text{m s}^{-1}$  (n=10,  $\pm$  s.e.) (Fig 6D).

We next examined how propagating  $[Ca^{2+}]_{fla}$  elevations influenced the movement of paused IFT trains to determine whether  $Ca^{2+}$  acted in a local or global manner within the flagellum. Irrespective

of whether the  $[Ca^{2+}]_{fla}$  wave initiated in the distal or proximal region, we found that the movement of paused retrograde IFT trains in the distal region corresponded closely to the time at which  $[Ca^{2+}]_{fla}$  became elevated in the distal region, rather than the proximal region (Fig 6E-F). This indicates that  $[Ca^{2+}]_{fla}$  elevations act locally, requiring co-localisation with the paused retrograde IFT trains in order to initiate their movement.

### **$[Ca^{2+}]_{fla}$ elevations disrupt microsphere movement along the flagellum**

Our results strongly support a role for  $Ca^{2+}$  in regulating the interaction of FMG-1B with IFT particles. This interaction can be readily visualised by following the movement of fluorescent microspheres along the flagellum<sup>17</sup>. Through simultaneous imaging of fluorescent microspheres and IFT27-GFP, we observed that microspheres stopped moving in a particular direction when the microsphere switched to an IFT train moving in the opposite direction or reached the end of the flagellum (Fig 7A). However, on some occasions the microspheres could be observed to dissociate from the IFT train (anterograde or retrograde) and exhibit diffusional movement in the flagella membrane. We hypothesised that these events represented a disruption of the interaction between the IFT particle and FMG-1B, which could be mediated by  $[Ca^{2+}]_{fla}$  elevations. We therefore next observed microsphere movements along a flagellum whilst simultaneously monitoring  $[Ca^{2+}]_{fla}$ . 12 out of 25 flagella exhibiting IFT-driven microsphere movement also exhibited a  $[Ca^{2+}]_{fla}$  elevation during this period. In each of these flagella, the  $[Ca^{2+}]_{fla}$  elevation coincided directly with the cessation of microsphere movement, with the microsphere either subsequently exhibiting diffusional movement or becoming detached from the flagellum entirely (Fig 7B-C; Video 3). We attribute the latter events to a strong attraction between the microsphere and the poly-lysine treated surface. Moreover, we did not observe microspheres moving on flagella that exhibited high frequency  $[Ca^{2+}]_{fla}$  elevations. We conclude that  $[Ca^{2+}]_{fla}$  elevations act directly to disrupt the interaction between IFT trains and FMG-1B.

## Discussion

The mechanisms regulating the interactions between IFT complexes and their cargo proteins underpin many aspects of ciliary function<sup>36</sup>. Our results show that  $\text{Ca}^{2+}$  signalling plays an important role in regulating transient interactions between the flagella membrane glycoprotein FMG-1B and the IFT complex in adherent *Chlamydomonas* flagella. The primary role of the  $[\text{Ca}^{2+}]_{\text{fla}}$  elevations is to disrupt the interaction between FMG-1B and paused retrograde IFT trains, which allows the retrograde IFT trains to return to the cell body and releases FMG-1B to move freely in the flagella membrane. We did not find evidence for a requirement for  $[\text{Ca}^{2+}]_{\text{fla}}$  elevations in regulating other aspects of IFT, for example by promoting the pausing of anterograde or retrograde IFT trains or directly influencing their movement. Chien et al<sup>2</sup> found that the removal of external  $\text{Ca}^{2+}$  increased the residency of IFT trains at the flagella tip, suggesting that  $\text{Ca}^{2+}$  may have a regulatory role in the assembly or departure of retrograde trains. We were not able to directly assess the turnaround of IFT trains in our analyses. However, we did observe that retrograde IFT trains continue to accumulate in the absence of external  $\text{Ca}^{2+}$ , indicating that IFT turnaround can continue following the inhibition of  $[\text{Ca}^{2+}]_{\text{fla}}$  elevations. Moreover, we observed that many retrograde IFT trains paused directly in the vicinity of the flagella tip, which may influence measurement of turnover.

Whilst the interaction between the IFT particle and FMG-1B is implied from the coordinated movement of fluorescent microspheres and IFT trains<sup>17</sup>, biochemical characterisation of this interaction is lacking. Recent characterisation of an *fmg-1b* mutant line<sup>37</sup> supports previous observations that FMG-1B is the primary protein in the flagellum mediating contact with solid substrates<sup>38, 39</sup>, although an additional flagella membrane glycoprotein, FAP113, was recently identified through its interactions with microspheres<sup>40</sup>. It seems likely that surface contact, which induces cross-linking of FMG-1B<sup>41</sup>, acts to promote an interaction between FMG-1B and retrograde IFT trains, as retrograde IFT trains do not accumulate in non-adherent flagella<sup>20</sup>. We propose that elevations in  $[\text{Ca}^{2+}]_{\text{fla}}$  in the vicinity of the paused IFT train likely lead to a direct conformational shift in a  $\text{Ca}^{2+}$ -sensitive protein within the putative IFT/FMG-1B complex, disrupting the interaction. This mechanism would be analogous to the regulated movement of mitochondria along microtubules in neurons and other animal cell types, where the interaction between the mitochondrion and kinesin or dynein is mediated by the  $\text{Ca}^{2+}$ -binding Rho-GTPase Miro<sup>42</sup>. Elevated cytosolic  $\text{Ca}^{2+}$  triggers a conformational change in Miro, which possesses two  $\text{Ca}^{2+}$ -binding EF-hands, leading to the dissociation of the mitochondrion from the microtubule motor complex<sup>43</sup>.

$[\text{Ca}^{2+}]_{\text{fla}}$  elevations in adherent *Chlamydomonas* flagella were primarily observed in flagella under tension, i.e. immediately prior to trailing or lifting movements, and flagella that were not moving usually did not exhibit  $[\text{Ca}^{2+}]_{\text{fla}}$  elevations. In contrast, flagella immobilised on a highly adherent surface often exhibited high frequency repetitive  $[\text{Ca}^{2+}]_{\text{fla}}$  elevations. This suggests that immobilisation in this manner also causes membrane tension, triggering the repetitive  $[\text{Ca}^{2+}]_{\text{fla}}$  elevations. Our results indicate

that the primary role of  $[Ca^{2+}]_{fla}$  elevations in adherent flagella relates to modulating their adhesion to the surface. When not in contact with anterograde or retrograde IFT trains, FMG-1B can diffuse freely along the flagellum, as demonstrated by microsphere movements<sup>37</sup>. This allows an adherent flagellum to slide along a surface whilst maintaining contact with it. In a trailing flagellum, some of the FMG-1B is shed onto the surface, leaving a ‘snail trail’ of adhesive glycoprotein, which allows gliding motility to continue beyond a single flagellum length<sup>40</sup> (Supplementary Fig 6). However, when FMG-1B becomes bound to retrograde IFT trains, the dynein motors act to pull the flagellum forward. The flagellum is therefore resistant to any movement in the direction of the cell body, unless the interactions between FMG-1B and the IFT trains are disrupted. The resistance to the pulling force likely contributes to an increase in membrane tension that triggers  $[Ca^{2+}]_{fla}$  elevations. The  $[Ca^{2+}]_{fla}$  elevations therefore do not act to modify adhesion directly, but to allow unrestricted movement of FMG-1B along the membrane, which in turn allows the flagellum to be dragged along a surface to enable gliding motility or flagella lifting (Supplementary Fig 7). If the flagellum is immobilised on a highly adherent surface, the membrane tension cannot be relieved, leading to the highly repetitive  $[Ca^{2+}]_{fla}$  elevations observed on poly-lysine treated surfaces. Although the repetitive  $[Ca^{2+}]_{fla}$  elevations act to prevent the accumulation of paused retrograde IFT trains, in this situation the flagella remain immobilised due to the highly adherent nature of the surface itself.

Like many cilia, *Chlamydomonas* flagella are mechanosensitive and contain a number of candidate ion channels that may contribute to signalling in response to changes in membrane tension<sup>24, 44, 45</sup>. RNAi knockdown of the transient receptor potential (TRP) channel TRP11 resulted in a defect in the mechanoshock response of swimming *Chlamydomonas* cells<sup>46</sup>. *Chlamydomonas* flagella also possess a homologue of PKD2, which has been implicated in mechanosensation in mammalian cilia, although direct evidence for mechanosensory calcium signalling in primary cilia is lacking<sup>47, 48</sup>. *Chlamydomonas* PKD2 localises to the flagella membrane, but is also bound to the axoneme and to extracellular glycoprotein polymers known as mastigonemes that resemble hair-like appendages along the distal regions of the flagella<sup>49, 50</sup>. The tethering of PKD2 to mastigonemes and the axoneme supports a mechanosensory role in *Chlamydomonas*<sup>50</sup>.

The development of flagella-localised  $Ca^{2+}$ -reporters in *Chlamydomonas* should now aid the molecular identification of specific ion channels responsible for flagellar  $Ca^{2+}$  signalling in adherent flagella. However, the nature of flagella adhesion and membrane tension will be a critical consideration for future studies of flagella  $Ca^{2+}$  signalling, particularly when comparing phenotypes between strains. Gliding motility is often markedly different between strains and rapid modulation of flagella adhesion can occur within seconds even within individual cells<sup>22</sup>. The *pkd2* mutants’ lack of mastigonemes, indicates that ion channel mutants may influence the arrangement of flagella glycoproteins<sup>50</sup>. Whilst mastigonemes are not thought to be involved in microsphere movements or gliding motility<sup>51, 52</sup>, it is clear that knockout of an ion channel could influence the processes that trigger  $[Ca^{2+}]_{fla}$  elevations (i.e. flagella adhesion). Without direct measurements of the degree of adhesion and/or membrane tension in

these mutant strains, it may be difficult to ascertain whether any effects on  $\text{Ca}^{2+}$  signalling result from direct mechanistic inhibition of  $[\text{Ca}^{2+}]_{\text{fla}}$  elevations or relate to indirect effects on flagella adhesion.

Repetitive  $\text{Ca}^{2+}$  elevations can be observed in many excitable cell types in the presence of a continuous stimulus. In adherent *Chlamydomonas* flagella, the initial activation of a mechanosensitive ion channel may act to depolarise the flagella membrane, leading to activation of voltage-gated  $\text{Ca}^{2+}$  channels and a resultant action potential. If the stimulus persists (i.e. membrane tension), the voltage-gated  $\text{Ca}^{2+}$  channels can activate again following a refractory period, leading to a series of repetitive  $\text{Ca}^{2+}$  elevations. The presence of voltage-gated  $\text{Ca}^{2+}$  channels in *Chlamydomonas* flagella is well documented<sup>53,54</sup> and we have previously observed transient depolarisations in the flagella membrane during gliding motility<sup>20</sup>. The presence of localised or propagating  $[\text{Ca}^{2+}]_{\text{fla}}$  elevations suggests that the mechanisms underlying flagella  $\text{Ca}^{2+}$  signalling may exhibit greater complexity. It is possible that the propagating  $[\text{Ca}^{2+}]_{\text{fla}}$  elevations represent simple diffusion of  $\text{Ca}^{2+}$  in the flagella matrix following a localised  $[\text{Ca}^{2+}]_{\text{fla}}$  elevation. In mammalian ependymal cells,  $\text{Ca}^{2+}$  elevations in the cytosol can diffuse along cilia at a rate of approximately  $20 \mu\text{m s}^{-1}$ <sup>55</sup>. However, our previous studies suggest that  $\text{Ca}^{2+}$  elevations in the *Chlamydomonas* cytosol are not directly coupled to  $[\text{Ca}^{2+}]_{\text{fla}}$  elevations<sup>20,56</sup>, which may indicate a greater degree of  $\text{Ca}^{2+}$  buffering in *Chlamydomonas* flagella. In addition, ion channels that are typically associated with the active propagation of cytosolic  $\text{Ca}^{2+}$  elevations in animal cells are found in *Chlamydomonas* flagella. In mammalian cells, inositol triphosphate receptors (IP<sub>3</sub>R) typically localise to endomembranes, where they contribute to cytosolic  $\text{Ca}^{2+}$  waves through  $\text{Ca}^{2+}$ -activated  $\text{Ca}^{2+}$  release. A homologue of mammalian IP<sub>3</sub>R is present in *Chlamydomonas* flagella<sup>57</sup>, which could potentially mediate propagation of localised  $[\text{Ca}^{2+}]_{\text{fla}}$  elevations through  $\text{Ca}^{2+}$ -activated  $\text{Ca}^{2+}$  influx.

It is becoming clear that the nature of ciliary  $\text{Ca}^{2+}$  signalling differs markedly between organisms and cell types<sup>58</sup>. Rapid changes in flagella  $\text{Ca}^{2+}$  have a well characterised role in the swimming motility of *Chlamydomonas*, in addition to their role in gliding motility<sup>59</sup>. Similar  $\text{Ca}^{2+}$ -dependent signalling mechanisms regulate swimming of ciliates such as *Paramecium*<sup>60</sup> and repetitive  $[\text{Ca}^{2+}]_{\text{fla}}$  elevations associated with chemotactic motile responses in metazoan sperm have also been studied extensively<sup>61</sup>. Whilst it is likely that flagella-localised voltage-gated  $\text{Ca}^{2+}$  channels contribute directly to  $[\text{Ca}^{2+}]_{\text{fla}}$  elevations in *Chlamydomonas* and *Paramecium*<sup>54,60</sup>, their role in mammalian sperm flagella are less clear. Patch-clamp approaches in mammalian sperm suggest that the weakly-voltage-gated CatSper channels are primary contributors to flagella  $\text{Ca}^{2+}$  elevations, rather than voltage-gated  $\text{Ca}^{2+}$  channels (Cav)<sup>62</sup>. Although CatSper are also found in some protist lineages (e.g. glaucophytes), they are absent from *Chlamydomonas*<sup>63</sup>. Furthermore, whilst voltage-gated  $\text{Ca}^{2+}$  channels are present in motile ependymal cilia of mammalian cells, ciliary  $\text{Ca}^{2+}$  in these cells appeared to be passively coupled to  $[\text{Ca}^{2+}]_{\text{cyt}}$  rather than independently controlled<sup>55</sup>. The nature of  $\text{Ca}^{2+}$  signalling in the non-motile primary cilia of mammalian cells is also highly distinct from the excitable cilia of unicellular protists, with primary cilia exhibiting a high resting  $\text{Ca}^{2+}$  determined primarily by the activity of the TRP channel PKD2L1<sup>12</sup>. Therefore, although  $\text{Ca}^{2+}$ -dependent signalling mechanisms appear to be

ubiquitous in cilia and flagella, the nature of these mechanisms and their underlying molecular components differ considerably between eukaryotes.

In summary, our results indicate that interactions between IFT trains and flagella membrane proteins can be directly influenced by rapid transient  $[Ca^{2+}]_{fla}$  elevations. As FMG-1B is an abundant protein in *Chlamydomonas* flagella, these interactions can be readily observed through the movement of microspheres or gliding motility. However, it is likely that regulated transient interactions with IFT complexes also direct the movement of many other flagella membrane proteins. Future biochemical characterisation of the FMG-1B/IFT complex, and in particular the identification of the  $Ca^{2+}$ -sensitive components that mediate the response to  $[Ca^{2+}]_{fla}$  elevations, will help identify whether these mechanisms are conserved in other ciliated organisms.

## **Materials and Methods**

### **Strains and culture conditions**

*Chlamydomonas reinhardtii* cells were grown in standard Tris-acetate-phosphate (TAP) media at 21°C on a 16:8 hour light:dark cycle with a photosynthetic photon flux density of 80  $\mu\text{mol m}^{-2} \text{s}^{-1}$ . Wild type strain CC-5325, D1bLIC-GFP (CC-4488)<sup>28</sup> and KAP-GFP (CC-4296 - *fla3-1* background<sup>29</sup>) were obtained from the Chlamydomonas Resource Centre (<http://chlamycollection.org/>). *Chlamydomonas* strains expressing CAH6-Venus and IFT27-GFP (CC125 background) were obtained from Luke Mackinder (York) and Joel Rosenbaum (Yale) respectively<sup>31, 64</sup>. IFT20-mCherry (null *ift20* background<sup>65</sup>) and the IFT54-mScarlet reporter strain (IFT54-MS) were provided by Karl Lechtreck (University of Georgia). The IFT54-MS strain was constructed by expressing IFT54-mScarlet in an *ift54-2* background<sup>32</sup>. The IFT54-mScarlet vector was made by cutting out mNeonGreen from pBR25-mNG-IFT54 using *XhoI* and *BamHI* and replaced with a PCR product encoding mScarlet-I using the mammalian codon usage trimmed with the same enzymes<sup>32</sup>.

### **Development of a flagella-targeted calcium sensor**

The flagella targeted calcium reporter was prepared by modifying the pLM005-CAH6-Venus vector used to express the flagella-localised carbonic anhydrase CAH6<sup>31</sup>. Codon-optimised G-GECO1.1 was synthesised (Genscript) and introduced into the pLM005-CAH6-Venus expression vector via the sites *BglIII* and *EcoRI*, resulting in a C-terminal fusion of G-GECO to CAH6, separated by a short amino acid linker sequence. The GG-WT and GG-IFT54-MS strains were produced by transforming *C. reinhardtii* strains CC5325 (wild type) and IFT54-MS by electroporation using a NEPA21 Super Electroporator (NepaGene, Japan)<sup>66</sup>. Cells were grown to a cell density of  $1-2 \times 10^7$  cells  $\text{mL}^{-1}$ . The cultured cells were collected by centrifugation (2000 rpm, 3 min) and re-suspended in TAP media containing 40 mM sucrose to a final density of  $1-1.5 \times 10^8$  cells  $\text{mL}^{-1}$ .  $1 \times 10^7$  cells and 350 ng of plasmid DNA (pLM005-CAH6-G-GECO construct linearized with *EcoRV*) were suspended in a total volume of 20-30  $\mu\text{L}$  and placed into an electroporation cuvette (2 mm). The measured value of electric impedance was within 500-650  $\Omega$ . Electroporation utilised a first pulse (Pp) at 250 V with 8 ms pulse length, 50 ms pulse interval and 40% decay rates. The second pulse consisted of multiple transfer pulses (Tp) of 20 V with 50 ms pulse length, 50 ms pulse interval and 40% decay rate (2 iterations). Cells were transferred into 10 mL TAP media containing 40 mM sucrose and incubated in dim light ( $2-3 \mu\text{mol photons m}^{-2} \text{s}^{-1}$ ) for 24 h. The cells were collected by centrifugation (2000 rpm, 3 min) and plated onto 1.5 % agar TAP plate containing 10  $\mu\text{g mL}^{-1}$  hygromycin B (Roche) and 20  $\mu\text{g mL}^{-1}$  of paromomycin sulfate (Fisher BioReagents).

### **Biolistic loading of $\text{Ca}^{2+}$ dyes**



For experiments where flagella  $\text{Ca}^{2+}$  was measured using fluorescent dyes, dyes were loaded into cells using a biolistic approach<sup>20</sup>. 0.9 mg of 0.6  $\mu\text{m}$  diameter gold microcarriers (Bio-Rad) were coated in 40  $\mu\text{g}$  Oregon green-BAPTA dextran (10000 MW) and 24  $\mu\text{g}$  Texas red dextran (10000 MW) (Invitrogen). Oregon Green-BAPTA is  $\text{Ca}^{2+}$ -responsive, whereas Texas Red acts as a non-responsive reference dye. Texas Red was omitted for simultaneous imaging of  $\text{Ca}^{2+}$  and IFT20-mCherry. *Chlamydomonas* cells were harvested in mid-exponential phase by gentle centrifugation (400  $g$  for 3 min) and resuspended in loading buffer (10 mM HEPES pH 7.4, 20  $\mu\text{M}$   $\text{K}^+$  glutamate and 50 mM sorbitol).  $5 \times 10^6$  cells were spread onto a 0.45  $\mu\text{m}$  nitrocellulose membrane filter (Millipore) and loaded biolistically using a PDS-1000 delivery system (Bio-Rad) (1100 psi rupture disc). After loading, cells were washed and resuspended in TAP media and allowed to recover for at least 2 hours prior to imaging.

### **TIRF imaging of flagella**

For all experiments, *Chlamydomonas* cells were suspended in a HEPES/NMG buffer consisting of 5 mM HEPES, 1 mM KCl, 1 mM HCl, 500  $\mu\text{M}$   $\text{CaCl}_2$ , 200  $\mu\text{M}$  EGTA (free  $\text{Ca}^{2+}$  301  $\mu\text{M}$ ) and pH adjusted to 7.4 with N-methyl-D-glucamine [6]. To remove external  $\text{Ca}^{2+}$ , cells were perfused with a  $\text{Ca}^{2+}$ -free buffer in which  $\text{CaCl}_2$  had been omitted. Cells were added to 35 mm glass bottom dishes (In Vitro Scientific), which in some cases were treated with 0.1% poly-lysine to promote flagella adhesion. TIRF microscopy was performed at room-temperature using a Nikon Eclipse Ti with 100x (1.49 NA) TIRF oil immersion objective and an EM-CCD camera (Photometrics Evolve). TIRF was achieved via through-the-lens laser illumination. Wavelength compensation was not applied. IFT20-mCherry and IFT54-mScarlet were excited using a 561 nm laser (Coherent), emission 575-625 nm. IFT27-GFP, Venus and G-GECO were excited using a 488 nm laser (Coherent), emission 500-550 nm. For two-channel imaging, simultaneous TIRF excitation was performed at 488 and 561 nm and a dual-view beam-splitter device was used to detect emission between 505-535 and 605-655 nm. Images were captured using NIS-Elements software (v3.1) at 100 ms per frame unless otherwise stated.

Fluorescence emission from single wavelength indicators such as G-GECO can be influenced by imaging artefacts such as flagella movement in the TIRF field of illumination. The use of a single emission wavelength calcium indicator was necessary for simultaneous imaging of IFT processes. We therefore performed a series of validation experiments to confirm that G-GECO was a reliable reporter of flagella  $\text{Ca}^{2+}$  elevations. 1) Rapid transient elevations in G-GECO fluorescence were not seen in the absence of external  $\text{Ca}^{2+}$  (Fig 3D). 2) G-GECO has a high dynamic range, exhibiting large changes in fluorescence emission on  $\text{Ca}^{2+}$  binding. Similar elevations in fluorescence were never observed in cells expressing CAH6-Venus, even during gliding motility (Supplementary Fig 1), indicating that motion artefacts do not give rise to large increases in fluorescence. 3) The nature of the  $[\text{Ca}^{2+}]_{\text{fla}}$  elevations (e.g. duration, frequency) observed using G-GECO were very similar to those observed using ratiometric imaging of the fluorescent dyes Oregon Green BAPTA dextran and Texas Red dextran<sup>20</sup>. Key findings using G-GECO were also verified using Oregon Green BAPTA dextran (e.g. Supplementary Fig 3B).

4) For detailed examination of  $[Ca^{2+}]_{fla}$  and IFT, imaging of G-GECO was performed primarily in flagella immobilised with 0.1% poly-lysine to ensure that motion artefacts were minimised. 5) Dual channel imaging of G-GECO and IFT54-mScarlet enabled visual confirmation that changes in the intensity of G-GECO fluorescence were not replicated in the IFT54-mScarlet channel and were therefore due to changes in  $[Ca^{2+}]_{fla}$  (Supplementary Fig 5C). This was particularly important for confirming that localised  $[Ca^{2+}]_{fla}$  elevations were not artefacts due to flagella movement (e.g. Fig 4A, 5A).

Red fluorescent carboxylate-modified microspheres (0.1  $\mu$ m diameter, Thermo) were used to image flagellar surface motility. Microspheres diluted in HEPES/NMG buffer were added to adherent cells and imaged by TIRF microscopy. Excitation with a 488nm laser alone was sufficient to simultaneously image G-GECO and microspheres due to the very high fluorescence emission of the microspheres. A dual-view beam-splitter device was used to detect emission between 505-535 (G-GECO or IFT27-GFP) and 605-655 nm (microspheres). Flagella exhibiting microsphere movements greater than 1  $\mu$ m were examined for the presence of  $[Ca^{2+}]_{fla}$  elevations during the course of microsphere movement.

For modulation of flagella adhesion with blue light, IFT54-MS cells were imaged by TIRF microscopy as previously, but a 488 nm laser was used to provide stimulation with blue light. Blue light was applied for 2 minutes to allow flagella to attach to the glass surface and then flagella lifting was examined after removing blue light for 30 seconds (defined as the removal of flagella from the surface, or a >50% decrease in flagella area in contact with the surface).

For imaging of flagella membrane glycoproteins, cells were stained with the fluorescent lectin concanavalin A (ConA) (100  $\mu$ g mL<sup>-1</sup>) conjugated to fluorescein isothiocyanate (FITC) (Invitrogen, United Kingdom) for 5 minutes. Cells were then centrifuged (400 g, 1 minute) and resuspended in HEPES/NMG buffer prior to TIRF imaging.

### **Data processing**

Images were smoothed using a 3x3 pixel filter (NIS elements) and kymographs were generated using ImageJ software (version 1.45s; <http://rsb.info.nih.gov/ij/>). To identify  $[Ca^{2+}]_{fla}$  elevations, we calculated the mean pixel intensity of G-GECO within a region of interest encompassing the whole flagellum, unless stated otherwise. Distal and proximal regions of interest were defined as regions 1  $\mu$ m in length at either end of the flagellum. For quantitative analysis, the baseline intensity was calculated using an asymmetric least squares smoothing algorithm (Origin) and changes in fluorescence emission were calculated using the ratio of fluorescence to the calculated baseline. Peaks were detected using Origin Pro software (peak finding method: local maximum with 5 local points), using a threshold value that differed from the baseline by 20%. IFT was monitored using TIRFM of fluorescently tagged IFT proteins. A kymograph of 60 s duration was used to determine the mean velocity of IFT particles and the frequency at which they were observed within this time period. Entry of anterograde IFT trains was

defined as the time at which the IFT train was first detected, as the region of the flagellum closest to the cell body may not be illuminated by TIRF excitation. IFT train velocity and frequency were quantified from the kymographs by measuring the slope and number of traces, respectively using ICY software<sup>67</sup>. The interaction between IFT events and  $[Ca^{2+}]_{fla}$  was examined by measuring relative G-GECO fluorescence coinciding with each event. To identify IFT events coinciding with the onset of  $[Ca^{2+}]_{fla}$  elevations, a derivative  $Ca^{2+}$  trace was calculated by dividing the fluorescence in each frame by the median of the three preceding frames. The onset of each  $[Ca^{2+}]_{fla}$  elevation was defined as the frame which displayed the greatest rate of change in fluorescence, and coinciding IFT events were defined as those events occurring within 0.5 s of this rise.

### **Fluorescence recovery after photobleaching (FRAP)**

For FRAP analysis of IFT, IFT54-MS cells were observed with a Nikon Eclipse Ti E inverted fluorescence microscope, equipped with a dual View DV2 (Photometrics) to detect emission between 505-535 and 605-655 nm, a iLAS FRAP module (Roper Scientifics) and Hamamatsu Flash 04 LT camera. Images were acquired using Metamorph software (version 7.7, Molecular Devices). IFT54-MS cells were placed in a poly-L-lysine (0.01%) treated dish and kept at room temperature during the acquisition. A segment of a flagellum was bleached by irradiation with a 150 mW green laser (Vortran), delivered through the 100X TIRF oil objective lens (100x, APO TIRF oil immersion, NA 1.49, Nikon) used for observation and focused on the specimen. The position to be photobleached was set at 50-70% of the flagellar length from the tip. The intensity of laser beam was 30%. Laser light for photobleaching was usually irradiated for about 1 sec. Images were recorded continuously for 15 sec before bleaching and then recovery was monitored for 45 sec by continuously recording videos with a 100 ms exposure.

### **Transmission Electron Microscopy (TEM)**

For chemical fixation of adherent *Chlamydomonas* flagella, cells were allowed to settle directly onto 0.01% poly-L-lysine coated coverslips for 5 min. The excess of cells was removed and cells were fixed with 1% glutaraldehyde in 0.1 M sodium cacodylate (pH7.2) buffer for 10 min. Coverslips were washed 3 x 5 min in 0.1 M cacodylate buffer and then stained with 1% uranyl acetate in distilled water for 1 h at 4°C. Coverslips were washed 3 x 10 min in distilled water. After serial dehydration with ethanol solution (30%, 50%, 70%, 90% et 3 x 100%), samples were embedded in Agar 100 resin (Agar Scientific). Coverslips were mounted in Agar 100 capsule and left to polymerize at 60°C for 2 days. To detach the coverslip, the sample was plunged into liquid nitrogen. First 200 nm ultrathin sections (50-70 nm) were collected in nickel grids Leica EM Uc 7 Ultramicrotome and stained with uranyl acetate

(1 %) and lead citrate (80 mM). Observations were made on a Jeol 1400 TEM electron microscope. Images were processed with ImageJ.

**Acknowledgements:** We thank Karl Lehtreck (Georgia), Joel Rosenbaum (Yale) and Luke Mackinder (York) for the generous supply of *Chlamydomonas* strains. The work was supported by a BBSRC award to GW (BB/M02508X/1) and an ERC Advanced Grant to CB (ERC-ADG-670390).

**Competing interests:** The authors declare that they have no competing interests.

## References

1. Pedersen, L.B. & Rosenbaum, J.L. Intraflagellar transport (IFT) role in ciliary assembly, resorption and signalling. *Curr Top Dev Biol* **85**, 23-61 (2008).
2. Chien, A. *et al.* Dynamics of the IFT machinery at the ciliary tip. *Elife* **6** (2017).
3. Hendel, N.L., Thomson, M. & Marshall, W.F. Diffusion as a Ruler: Modeling Kinesin Diffusion as a Length Sensor for Intraflagellar Transport. *Biophys J* **114**, 663-674 (2018).
4. Jordan, M.A., Diener, D.R., Stepanek, L. & Pigino, G. The cryo-EM structure of intraflagellar transport trains reveals how dynein is inactivated to ensure unidirectional anterograde movement in cilia. *Nat Cell Biol* **20**, 1250-1255 (2018).
5. Bhogaraju, S. *et al.* Molecular basis of tubulin transport within the cilium by IFT74 and IFT81. *Science* **341**, 1009-1012 (2013).
6. Dai, J., Barbieri, F., Mitchell, D.R. & Lechtreck, K.F. In vivo analysis of outer arm dynein transport reveals cargo-specific intraflagellar transport properties. *Mol Biol Cell* **29**, 2553-2565 (2018).
7. Mukhopadhyay, S. *et al.* TULP3 bridges the IFT-A complex and membrane phosphoinositides to promote trafficking of G protein-coupled receptors into primary cilia. *Genes Dev* **24**, 2180-2193 (2010).
8. Picariello, T. *et al.* A global analysis of IFT-A function reveals specialization for transport of membrane-associated proteins into cilia. *J Cell Sci* **132** (2019).
9. Liu, P. & Lechtreck, K.F. The Bardet-Biedl syndrome protein complex is an adapter expanding the cargo range of intraflagellar transport trains for ciliary export. *Proc Natl Acad Sci U S A* **115**, E934-E943 (2018).
10. Lechtreck, K.F. IFT-Cargo Interactions and Protein Transport in Cilia. *Trends Biochem Sci* **40**, 765-778 (2015).
11. Mukhopadhyay, S. *et al.* The ciliary G-protein-coupled receptor Gpr161 negatively regulates the Sonic hedgehog pathway via cAMP signaling. *Cell* **152**, 210-223 (2013).
12. Delling, M., DeCaen, P.G., Doerner, J.F., Febvay, S. & Clapham, D.E. Primary cilia are specialized calcium signalling organelles. *Nature* **504**, 311-314 (2013).
13. Liang, Y. *et al.* FLA8/KIF3B phosphorylation regulates kinesin-II interaction with IFT-B to control IFT entry and turnaround. *Dev Cell* **30**, 585-597 (2014).
14. Bloodgood, R.A. Flagella-Dependent Gliding Motility in *Chlamydomonas*. *Protoplasma* **106**, 183-192 (1981).
15. Bloodgood, R.A. The *Chlamydomonas* flagellar membrane and its dynamic properties, in *The Chlamydomonas Sourcebook*. (ed. G.B. Witman) 309-368 (Academic Press, Oxford; 2009).
16. Bloodgood, R.A. & Workman, L.J. A flagellar surface glycoprotein mediating cell-substrate interaction in *Chlamydomonas*. *Cell Motil* **4**, 77-87 (1984).
17. Shih, S.M. *et al.* Intraflagellar transport drives flagellar surface motility. *Elife* **2**, e00744 (2013).
18. Bloodgood, R.A. Flagellar surface motility: gliding and microsphere movements. *Methods Cell Biol* **47**, 273-279 (1995).
19. Bloodgood, R.A. & Salomonsky, N.L. Calcium influx regulates antibody-induced glycoprotein movements within the *Chlamydomonas* flagellar membrane. *J Cell Sci* **96 ( Pt 1)**, 27-33 (1990).
20. Collingridge, P., Brownlee, C. & Wheeler, G.L. Compartmentalized calcium signaling in cilia regulates intraflagellar transport. *Curr Biol* **23**, 2311-2318 (2013).
21. Kreis, C.T., Grangier, A. & Baumchen, O. In vivo adhesion force measurements of *Chlamydomonas* on model substrates. *Soft Matter* **15**, 3027-3035 (2019).
22. Kreis, C.T., Le Blay, M., Linne, C., Makowski, M.M. & Baumchen, O. Adhesion of *Chlamydomonas* microalgae to surfaces is switchable by light. *Nat Phys* **14**, 45-49 (2018).
23. Hegemann, P. & Berthold, P. Sensory photoreceptors and light control of flagellar activity, in *The Chlamydomonas Sourcebook*. (ed. G.B. Witman) 395-429 (Academic Press, Oxford; 2009).

24. Wheeler, G.L. Calcium-dependent signalling processes in *Chlamydomonas*, in *Chlamydomonas: Molecular Genetics and Physiology*. (ed. M. Hippler) 233-255 (Springer, Switzerland; 2017).
25. Goodenough, U.W. *et al.* The role of calcium in the *Chlamydomonas reinhardtii* mating reaction. *Journal of Cell Biology* **121**, 365-374 (1993).
26. Quarmby, L.M. Ca<sup>2+</sup> influx activated by low pH in *Chlamydomonas*. *Journal of General Physiology* **108**, 351-361 (1996).
27. Stepanek, L. & Pigino, G. Microtubule doublets are double-track railways for intraflagellar transport trains. *Science* **352**, 721-724 (2016).
28. Reck, J. *et al.* The role of the dynein light intermediate chain in retrograde IFT and flagellar function in *Chlamydomonas*. *Mol Biol Cell* **27**, 2404-2422 (2016).
29. Mueller, J., Perrone, C.A., Bower, R., Cole, D.G. & Porter, M.E. The FLA3 KAP subunit is required for localization of kinesin-2 to the site of flagellar assembly and processive anterograde intraflagellar transport. *Mol Biol Cell* **16**, 1341-1354 (2005).
30. Engel, B.D. *et al.* The role of retrograde intraflagellar transport in flagellar assembly, maintenance, and function. *J Cell Biol* **199**, 151-167 (2012).
31. Mackinder, L.C.M. *et al.* A Spatial Interactome Reveals the Protein Organization of the Algal CO<sub>2</sub>-Concentrating Mechanism. *Cell* **171**, 133-147 e114 (2017).
32. Wingfield, J.L. *et al.* IFT trains in different stages of assembly queue at the ciliary base for consecutive release into the cilium. *Elife* **6** (2017).
33. Foreman, J. *et al.* Reactive oxygen species produced by NADPH oxidase regulate plant cell growth. *Nature* **422**, 442-446 (2003).
34. Steinhorst, L. & Kudla, J. Calcium - a central regulator of pollen germination and tube growth. *Biochim Biophys Acta* **1833**, 1573-1581 (2013).
35. Pazour, G.J., Dickert, B.L. & Witman, G.B. The DHC1b (DHC2) isoform of cytoplasmic dynein is required for flagellar assembly. *J Cell Biol* **144**, 473-481 (1999).
36. Bhogaraju, S., Engel, B.D. & Lorentzen, E. Intraflagellar transport complex structure and cargo interactions. *Cilia* **2**, 10 (2013).
37. Bloodgood, R.A., Tetreault, J. & Sloboda, R.D. The *Chlamydomonas* flagellar membrane glycoprotein FMG-1B is necessary for expression of force at the flagellar surface. *J Cell Sci* **132** (2019).
38. Bloodgood, R.A. Dynamic properties of the flagellar surface. *Symp Soc Exp Biol* **35**, 353-380 (1982).
39. Bloodgood, R.A. Preferential turnover of membrane proteins in the intact *Chlamydomonas* flagellum. *Exp Cell Res* **150**, 488-493 (1984).
40. Kamiya, R., Shiba, K., Inaba, K. & Kato-Minoura, T. Release of Sticky Glycoproteins from *Chlamydomonas* Flagella During Microsphere Translocation on the Surface Membrane. *Zool Sci* **35**, 299-305 (2018).
41. Bloodgood, R.A. & Salomonsky, N.L. Microsphere attachment induces glycoprotein redistribution and transmembrane signaling in the *Chlamydomonas* flagellum. *Protoplasma* **202**, 76-83 (1998).
42. Saotome, M. *et al.* Bidirectional Ca<sup>2+</sup>-dependent control of mitochondrial dynamics by the Miro GTPase. *Proc Natl Acad Sci U S A* **105**, 20728-20733 (2008).
43. Wang, X. & Schwarz, T.L. The mechanism of Ca<sup>2+</sup> -dependent regulation of kinesin-mediated mitochondrial motility. *Cell* **136**, 163-174 (2009).
44. Yoshimura, K. A novel type of mechanoreception by the flagella of *Chlamydomonas*. *J Exp Biol* **199**, 295-302 (1996).
45. Bezares-Calderon, L.A., Berger, J. & Jekely, G. Diversity of cilia-based mechanosensory systems and their functions in marine animal behaviour. *Philos Trans R Soc Lond B Biol Sci* **375**, 20190376 (2020).
46. Fujiu, K., Nakayama, Y., Iida, H., Sokabe, M. & Yoshimura, K. Mechanoreception in motile flagella of *Chlamydomonas*. *Nat Cell Biol* **13**, 630-632 (2011).
47. Delling, M. *et al.* Primary cilia are not calcium-responsive mechanosensors. *Nature* **531**, 656-660 (2016).

48. Lee, K.L. *et al.* The primary cilium functions as a mechanical and calcium signaling nexus. *Cilia* **4**, 7 (2015).
49. Huang, K. *et al.* Function and dynamics of PKD2 in *Chlamydomonas reinhardtii* flagella. *J Cell Biol* **179**, 501-514 (2007).
50. Liu, P. *et al.* *Chlamydomonas* PKD2 organizes mastigonemes, hair-like glycoprotein polymers on cilia. *J Cell Biol* **219** (2020).
51. Bloodgood, R.A. Motility occurring in association with the surface of the *Chlamydomonas* flagellum. *J Cell Biol* **75**, 983-989 (1977).
52. Nakamura, S. *et al.* Assembly and function of *Chlamydomonas* flagellar mastigonemes as probed with a monoclonal antibody. *J Cell Sci* **109** ( Pt 1), 57-62 (1996).
53. Holland, E.M., Braun, F.J., Nonnengasser, C., Harz, H. & Hegemann, P. Nature of rhodopsin-triggered photocurrents in *Chlamydomonas* .1. Kinetics and influence of divalent ions. *Biophysical Journal* **70**, 924-931 (1996).
54. Fujiu, K., Nakayama, Y., Yanagisawa, A., Sokabe, M. & Yoshimura, K. *Chlamydomonas* CAV2 encodes a voltage-dependent calcium channel required for the flagellar waveform conversion. *Current Biology* **19**, 133-139 (2009).
55. Doerner, J.F., Delling, M. & Clapham, D.E. Ion channels and calcium signaling in motile cilia. *Elife* **4** (2015).
56. Bickerton, P., Sello, S., Brownlee, C., Pittman, J.K. & Wheeler, G.L. Spatial and temporal specificity of Ca(2+) signalling in *Chlamydomonas reinhardtii* in response to osmotic stress. *New Phytol* **212**, 920-933 (2016).
57. Pazour, G.J., Agrin, N., Leszyk, J. & Witman, G.B. Proteomic analysis of a eukaryotic cilium. *Journal of Cell Biology* **170**, 103-113 (2005).
58. Pablo, J.L., DeCaen, P.G. & Clapham, D.E. Progress in ciliary ion channel physiology. *J Gen Physiol* **149**, 37-47 (2017).
59. Holland, E.M., Harz, H., Uhl, R. & Hegemann, P. Control of phobic behavioral responses by rhodopsin-induced photocurrents in *Chlamydomonas*. *Biophys J* **73**, 1395-1401 (1997).
60. Eckert, R. & Brehm, P. Ionic mechanisms of excitation in *Paramecium*. *Annual Review of Biophysics and Bioengineering* **8**, 353-383 (1979).
61. Kaupp, U.B., Kashikar, N.D. & Weyand, I. Mechanisms of sperm chemotaxis. *Annu Rev Physiol* **70**, 93-117 (2008).
62. Lishko, P.V. *et al.* The control of male fertility by spermatozoan ion channels. *Annu Rev Physiol* **74**, 453-475 (2012).
63. Cai, X., Wang, X. & Clapham, D.E. Early evolution of the eukaryotic Ca<sup>2+</sup> signaling machinery: conservation of the CatSper channel complex. *Mol Biol Evol* **31**, 2735-2740 (2014).
64. Qin, H., Wang, Z., Diener, D. & Rosenbaum, J. Intraflagellar transport protein 27 is a small G protein involved in cell-cycle control. *Curr Biol* **17**, 193-202 (2007).
65. Lechtreck, K.F. *et al.* The *Chlamydomonas reinhardtii* BBSome is an IFT cargo required for export of specific signaling proteins from flagella. *J Cell Biol* **187**, 1117-1132 (2009).
66. Yamano, T., Iguchi, H. & Fukuzawa, H. Rapid transformation of *Chlamydomonas reinhardtii* without cell-wall removal. *J Biosci Bioeng* **115**, 691-694 (2013).
67. de Chaumont, F. *et al.* Icy: an open bioimage informatics platform for extended reproducible research. *Nature methods* **9**, 690-696 (2012).



**Figure legends:**

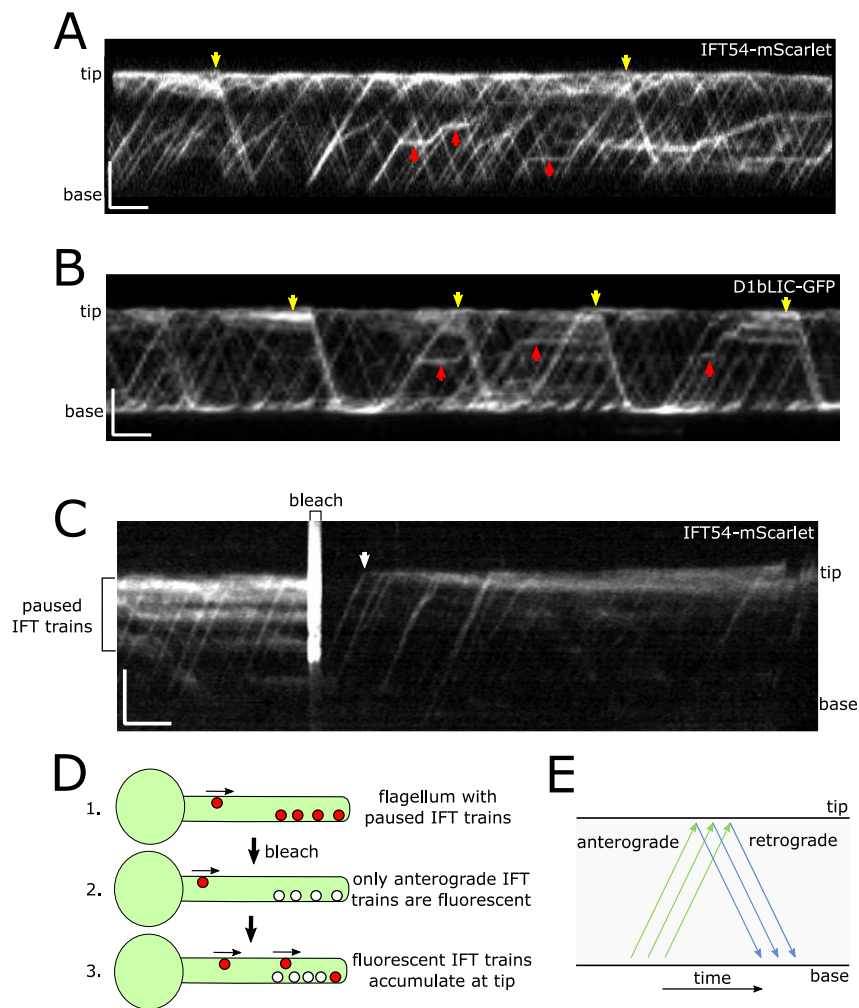

**Figure 1: Distinct forms of paused IFT particles in *Chlamydomonas* flagella.** **A)** Kymograph of IFT54-mScarlet indicating pausing of IFT trains. Individual anterograde IFT trains can be seen to pause and then continue in an anterograde direction (red arrows). Diffuse accumulations of paused IFT particles in the distal region of the flagellum are periodically cleared in a retrograde direction (yellow arrows). The schematic illustrates the position of paused IFT trains in the kymograph. Bars represent 5  $\mu$ m and 10 s. **B)** Kymograph of D1bLIC-GFP showing a series of distal accumulations that are cleared by retrograde movement (yellow arrows). **C)** Fluorescence recovery after bleaching (FRAP) of IFT54-mScarlet. IFT54-mScarlet was bleached to allow visualisation of the origin of distal IFT accumulations. After bleaching, IFT54-mScarlet does not begin to accumulate until anterograde IFT trains can be observed to reach the flagella tip (arrow). FRAP experiments were performed on 33 flagella. A representative image is shown. **D)** Schematic representation of FRAP experiment described in (C). **E)** Schematic representation of a kymograph showing the direction of anterograde and retrograde transport.

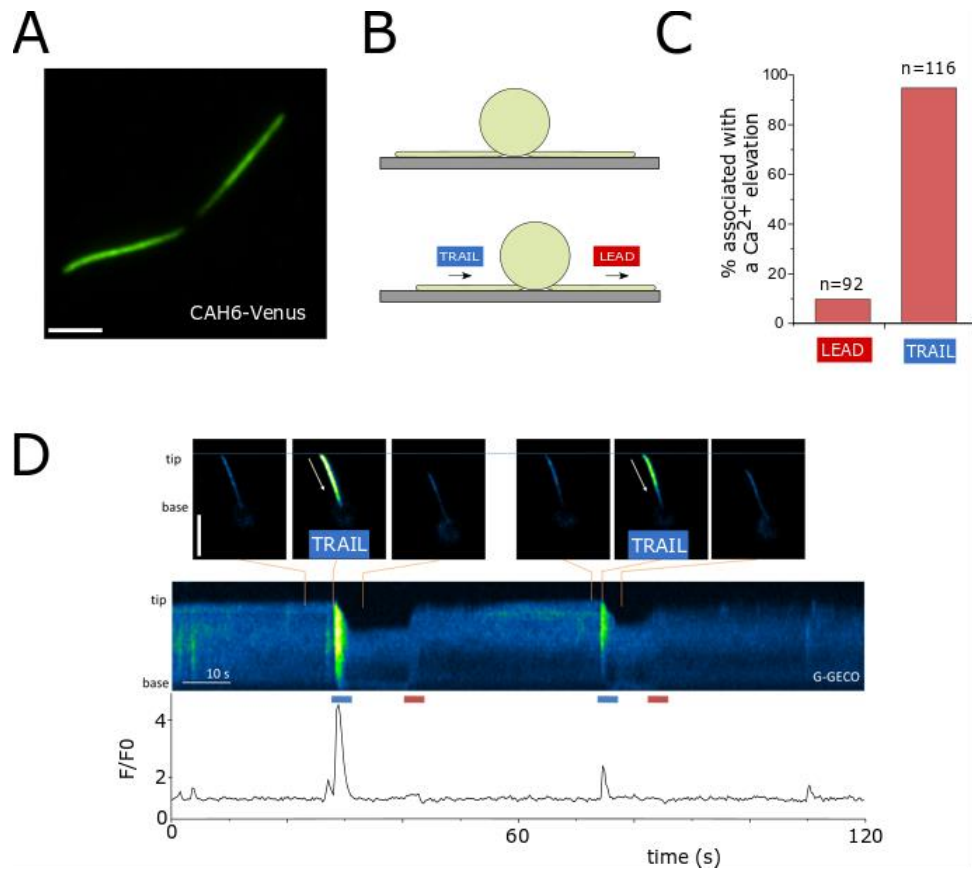

**Figure 2: Development of a flagella-targeted calcium sensor in *Chlamydomonas*.** **A)** Adherent flagella in a cell expressing CAH6-Venus, viewed by TIRF microscopy. Bar = 5  $\mu\text{m}$ . **B)** *Chlamydomonas* cells with adherent flagella. Gliding movement is powered by retrograde IFT motors in the leading flagellum, dragging the trailing flagellum. Bar = 5  $\mu\text{m}$ . **C)** Quantitation of  $[\text{Ca}^{2+}]_{\text{fla}}$  elevations associated with flagella movements. The percentage of gliding movements (leading and trailing) that coincide with a  $[\text{Ca}^{2+}]_{\text{fla}}$  elevation. **D)** Kymograph illustrating flagella  $\text{Ca}^{2+}$  ( $[\text{Ca}^{2+}]_{\text{fla}}$ ) elevations during gliding motility in wild type strain expressing CAH6-G-GECO (GG-WT strain). Significant  $[\text{Ca}^{2+}]_{\text{fla}}$  elevations are associated with dragging movements in trailing flagella but not with forward movement in leading flagella.

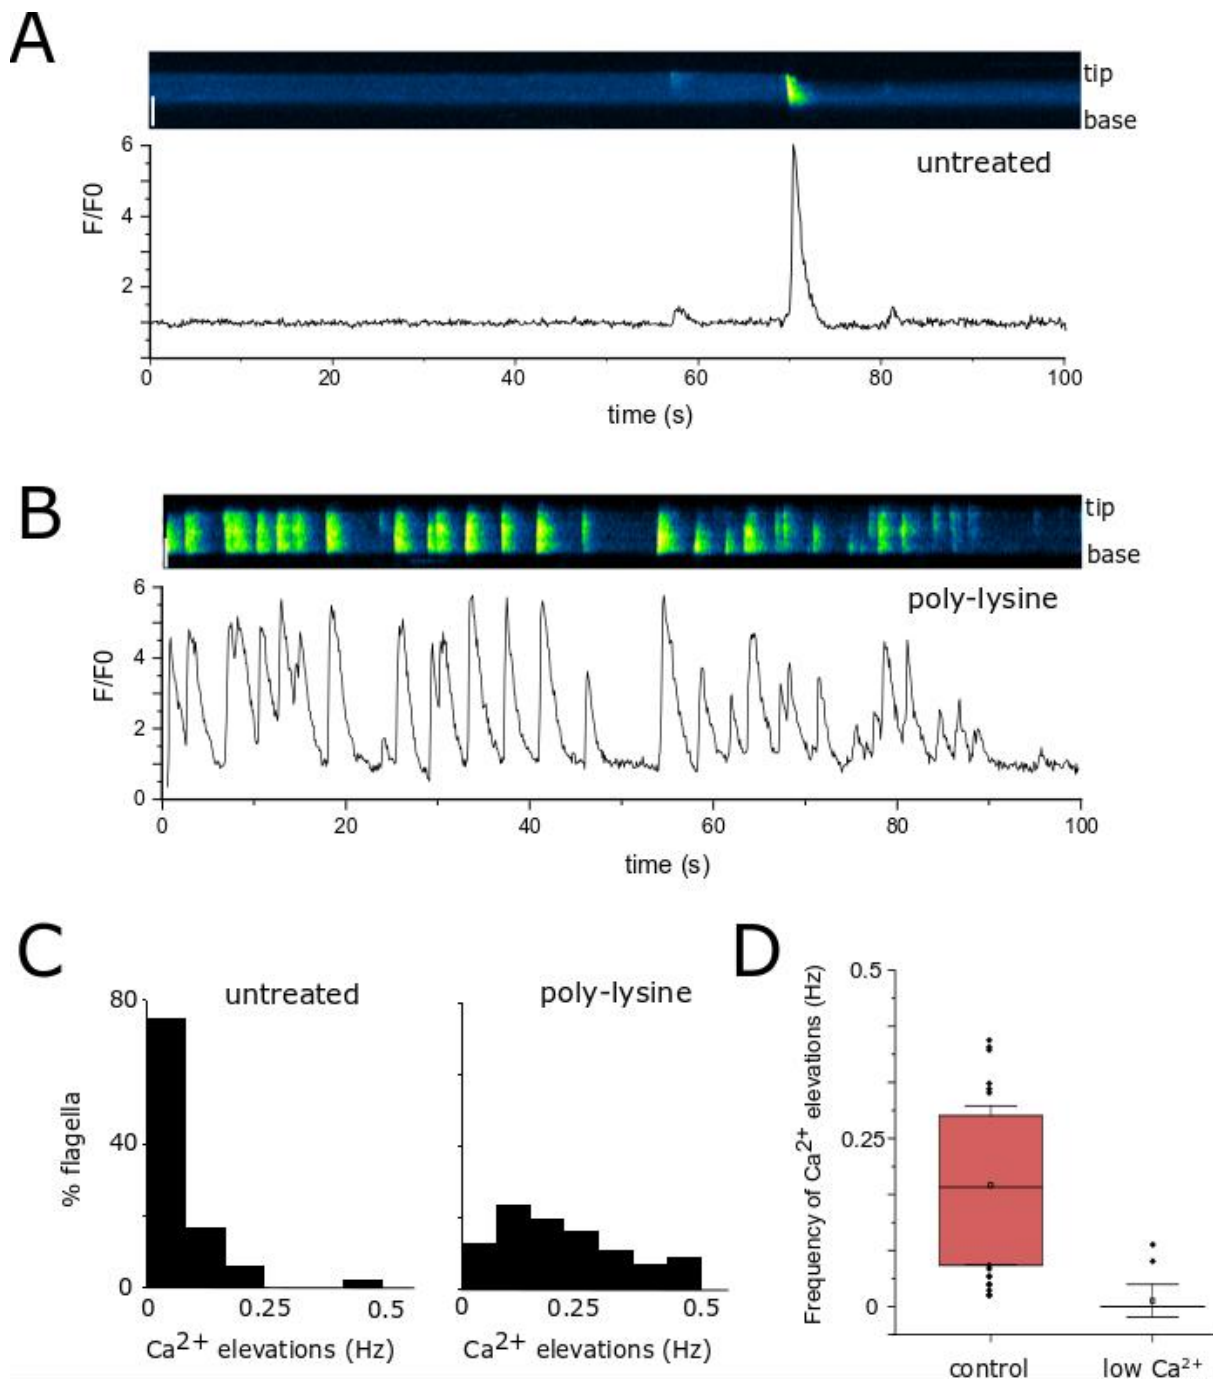

**Figure 3: Increased adhesion results in high frequency  $\text{Ca}^{2+}$  spiking within flagella.** **A)**  $[\text{Ca}^{2+}]_{\text{fla}}$  elevations in a flagellum adhering to a non-treated glass coverslip in GG-IFT54MS strain expressing CAH6-G-GECO and IFT54-mScarlet. Bar = 5  $\mu\text{m}$ . **B)**  $[\text{Ca}^{2+}]_{\text{fla}}$  elevations in a flagellum adhering to a coverslip treated with 0.1% poly-lysine. Bar = 5  $\mu\text{m}$ . **C)** Frequency histograms showing the percentage of flagella exhibiting different frequencies of  $[\text{Ca}^{2+}]_{\text{fla}}$  elevations. Bin size = 0.083Hz, (n = 48 flagella on untreated surface, 55 flagella on poly-lysine). **D)** Repetitive  $[\text{Ca}^{2+}]_{\text{fla}}$  elevations require external  $\text{Ca}^{2+}$ . Boxplots showing the frequency of  $[\text{Ca}^{2+}]_{\text{fla}}$  elevations in GG-IFT54MS cells after 20 minutes in

different concentrations of external  $\text{Ca}^{2+}$  (free  $\text{Ca}^{2+}$  calculated as 300  $\mu\text{M}$  or  $<1 \mu\text{M}$ ).  $n = 34$  and 21 flagella respectively.

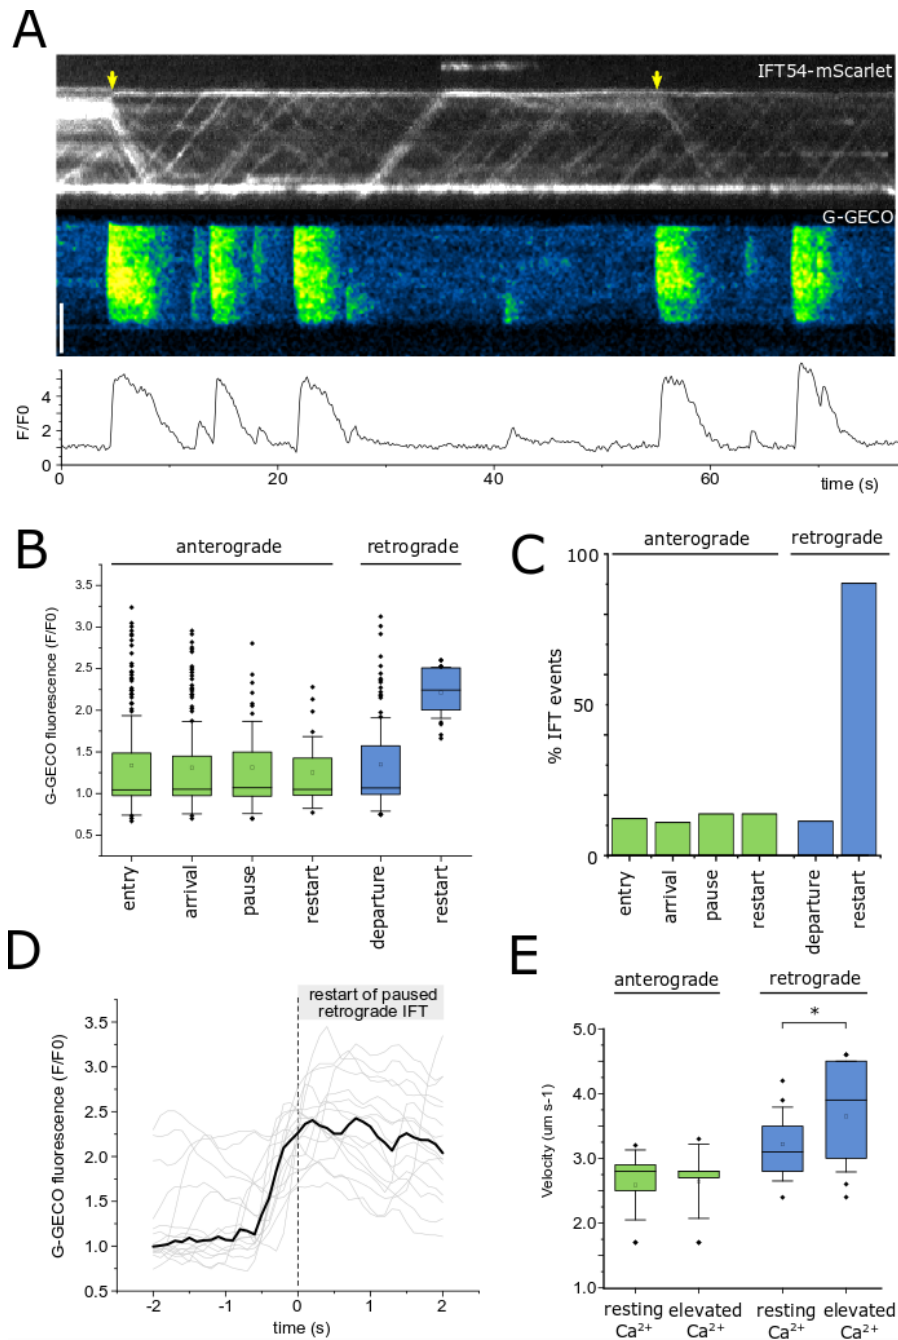

**Figure 4:  $[\text{Ca}^{2+}]_{\text{fla}}$  elevations coincide with retrograde movement of distal IFT accumulations. A)** Simultaneous imaging of G-GECO and IFT54-mScarlet. The kymographs indicate the movement of IFT54 (upper) and changes in  $[\text{Ca}^{2+}]_{\text{fla}}$  (lower) in a flagellum adhering to poly-lysine treated coverslip. Yellow arrow indicate movement of paused retrograde IFT trains. Bar = 5  $\mu\text{m}$ . **B)** Box plot showing  $[\text{Ca}^{2+}]_{\text{fla}}$  (displayed as relative G-GECO fluorescence) at the time of each IFT event. Six categories of IFT events were identified that could be clearly measured by TIRF microscopy. For anterograde IFT trains these were: entry into the flagellum, arrival at the flagella tip, pausing and restarting of paused anterograde IFT. For retrograde IFT, we identified trains departing from the flagella tip and the

restarting of paused retrograde IFT.  $n = 154, 133, 32, 22, 92$  and  $17$  IFT events for each category respectively. Box = median and 25-75% confidence interval, mean is open square, error bars represent standard deviation. **C)** Analysis of anterograde and retrograde IFT events that coincide with  $[Ca^{2+}]_{fla}$  elevations. The frequency histogram illustrates the percentage of each IFT event that was observed to coincide with the initiation of a  $[Ca^{2+}]_{fla}$  elevation.  $n = 1023, 82, 29, 29, 773, 41$  IFT events for each category respectively. **D)** Timing of  $[Ca^{2+}]_{fla}$  elevations associated with restart of paused retrograde IFT. 17 events are shown from 6 individual cells. Bold line = median trace, individual traces are shown in grey. **E)** Box plot showing the velocity of IFT trains during  $[Ca^{2+}]_{fla}$  elevations (i.e. whilst  $[Ca^{2+}]_{fla}$  was elevated above resting), relative to the velocity in the absence of a  $[Ca^{2+}]_{fla}$  elevation.  $n = 9$  flagella, with 200-410 IFT trains analysed for each category. Box = median and 25-75% confidence interval, mean is open square, error bars represent standard deviation. \* denotes  $p < 0.05$  paired t-test.

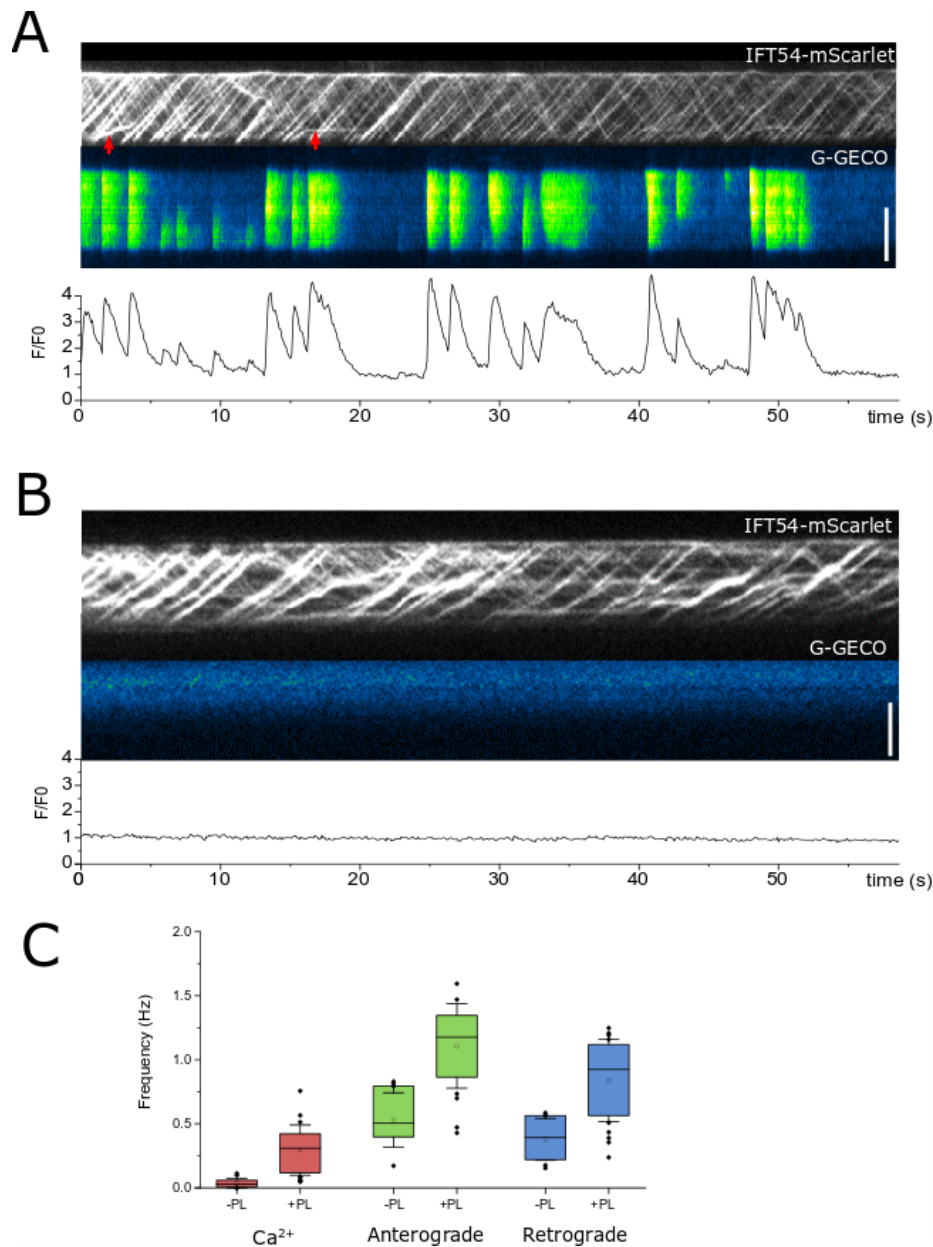

**Figure 5: Flagella exhibiting high frequency  $[Ca^{2+}]_{fla}$  elevations do not exhibit IFT accumulations.**

**A)** Simultaneous TIRF imaging of  $[Ca^{2+}]_{fla}$  and IFT54-mScarlet on a poly-lysine treated surface. Flagella exhibit highly repetitive  $[Ca^{2+}]_{fla}$  elevations, with a high frequency of anterograde and retrograde IFT. Pausing of anterograde IFT trains can still be observed (red arrows). **B)** As in (A) but on an untreated surface. **C)** Box plots showing the frequency of  $[Ca^{2+}]_{fla}$  elevations, anterograde IFT and retrograde IFT on untreated and poly-lysine treated (+PL) surfaces (n=11 and 20 flagella respectively). Box = median and 25-75% confidence interval, mean is open square, error bars represent standard deviation.

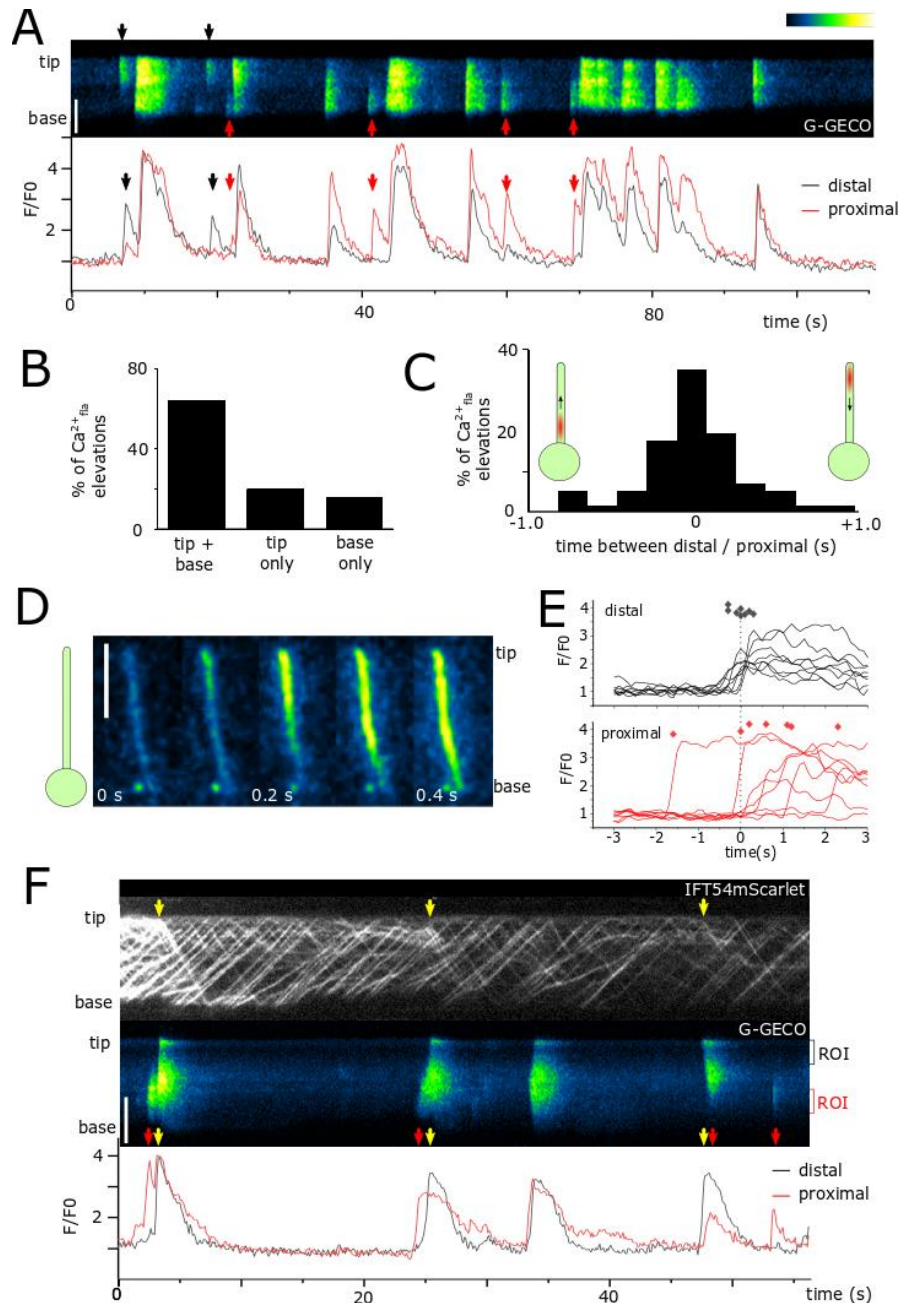

**Figure 6:  $[\text{Ca}^{2+}]_{\text{fla}}$  elevations have distinct spatial properties.** **A**) Kymograph showing the presence of localised  $\text{Ca}^{2+}$  elevations in GG-IFT54MS strain restricted to either the distal region (black arrow) or proximal region (red arrow). Bar = 5  $\mu\text{m}$ . **B**) Frequency histogram displaying the percentage of  $[\text{Ca}^{2+}]_{\text{fla}}$  elevations that occur across the whole flagellum or are restricted to either the distal or proximal regions.  $n = 250$   $[\text{Ca}^{2+}]_{\text{fla}}$  elevations from 7 flagella. **C**) Frequency histogram displaying the time difference between the rise time of  $[\text{Ca}^{2+}]_{\text{fla}}$  elevations in the distal region compared to proximal region for  $\text{Ca}^{2+}$  elevations that span the whole flagellum. Positive numbers reflect  $[\text{Ca}^{2+}]_{\text{fla}}$  elevations that rise first in the distal region and spread to the proximal region, whereas negative numbers indicate  $[\text{Ca}^{2+}]_{\text{fla}}$  elevations that initially arise in proximal regions.  $n = 57$  elevations from 9 flagella. Bin size = 0.2 seconds. **D**) Image series displaying a  $[\text{Ca}^{2+}]_{\text{fla}}$  elevation that propagates from the distal region. Bar = 5



$\mu\text{m}$ . **E)** Timing of  $[\text{Ca}^{2+}]_{\text{fla}}$  elevations in the distal and proximal regions of the flagellum, displayed relative to the onset of movement of paused retrograde IFT trains in the distal region (dotted line). Diamonds represent the onset of each  $[\text{Ca}^{2+}]_{\text{fla}}$  elevation defined as the greatest rate of change in fluorescence. Whilst  $[\text{Ca}^{2+}]_{\text{fla}}$  elevations in the distal region correspond closely to the movement of IFT trains,  $[\text{Ca}^{2+}]_{\text{fla}}$  elevations in the proximal region exhibit variable timing or are absent. **F)** Simultaneous imaging of  $[\text{Ca}^{2+}]_{\text{fla}}$  and IFT54-mScarlet indicates that movement of paused retrograde IFT trains in the distal region of the flagellum (yellow arrow) coincides with co-localising  $[\text{Ca}^{2+}]_{\text{fla}}$  elevations. Red arrows show  $[\text{Ca}^{2+}]_{\text{fla}}$  elevations restricted to the proximal region. Bar = 5  $\mu\text{m}$ .

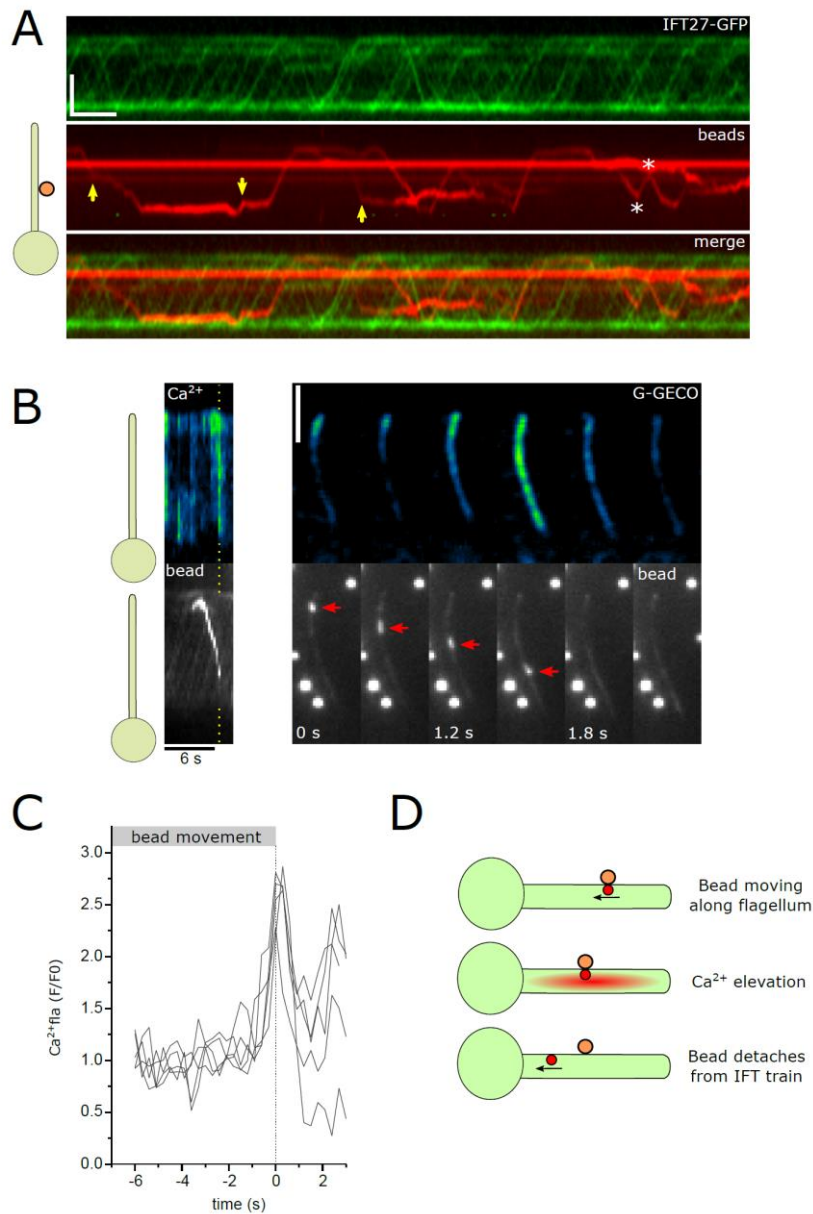

**Figure 7:  $[\text{Ca}^{2+}]_{\text{fla}}$  elevations inhibit movement of microspheres along the flagellum.** **A)** Kymograph displaying simultaneous TIRF imaging of IFT27-GFP and fluorescent microspheres. Microspheres moving in both anterograde and retrograde directions co-localise with IFT trains. Yellow arrows indicate events where microspheres dissociate from the IFT train and exhibit diffusive movement. Asterisks indicate events where microspheres rapidly change direction by associating to IFT trains moving in the opposite direction. Bar = 5  $\mu\text{m}$  and 10 s. **B)** Kymograph displaying simultaneous TIRF imaging of  $[\text{Ca}^{2+}]_{\text{fla}}$  and fluorescent microspheres. The image sequence demonstrates that the  $[\text{Ca}^{2+}]_{\text{fla}}$  elevation coincides directly with the end of movement of the microsphere (arrowed), which in this case is lost from the flagellum. Bar = 5  $\mu\text{m}$ . **C)**  $[\text{Ca}^{2+}]_{\text{fla}}$  elevations in flagella displaying IFT-driven microsphere movement.  $[\text{Ca}^{2+}]_{\text{fla}}$  traces are shown relative to the cessation of IFT-driven microsphere movement (n=5 flagella). **D)** Schematic displaying the proposed signalling events involved in the detachment of microspheres from IFT trains.
